# Supplementary material for: Assessment of the relationships between Ki67 expression and neoadjuvant treatment response and prognosis in breast cancer using two types of response evaluation systems
Source: Research Square preprint supplement (doi:10.21203/rs.3.rs-1543456/v2), 2022-09-21
Supplement: Supplementary file 1 [file 5e3c0fa1639e44119906c253.docx]

Tablo 5. Ki 67 values in molecular subtypes according to Miller-Payne RCB groups .

|  |  | Miller-Payne | | | Statistic | p | RCB | | | Statisitic | p |
| --- | --- | --- | --- | --- | --- | --- | --- | --- | --- | --- | --- |
| pNR | pPR | pCR | pNR | pPR | pCR |
| median (min -max.) | median (min-max.) | median (min-max.) | median (min -max.) | median (min-max.) | median (min-max.) |
| Luminal A | Pre-NAC Ki67 | 20,0 (5,0 - 70,0) | 20,0 (8,0 - 80,0) | 30,0 (30,0 - 30,0)* | U=211 | 0,238 | 20,0 (5,0 - 70,0) | 20,0 (5,0 - 80,0) | 30,0 (30,0 - 30,0)* | U=211 | 0,238 |
| Post-NAC Ki67 | 13,5 (2,0 - 70,0) | 5,0 (1,0 - 70,0) | --- | U=205,5 | 0,196 | 11,0 (1,0 - 70,0) | 5,0 (1,0 - 70,0) | --- | U=205,5 | 0,196 |
| Change Ki67 | 0,0 (-50,0 - 30,0) | 9,5 (-55,0 - 50,0) | --- | U=245 | 0,672 | 2,5 (-10,0 - 39,0) | 5,5 (-55,0 - 50,0) | --- | U=245 | 0,672 |
| Luminal B HER2- | Pre-NAC Ki67 | 30,0 (5,0 - 60,0) | 35,0 (5,0 - 80,0) | 60,0 (30,0 - 80,0) | =2,421 | 0,298 | 40,0 (10,0 - 80,0) | 30,0 (5,0 - 80,0) | 40,0 (30,0 - 80,0) | =0,932 | 0,627 |
| Post-NAC Ki67 | 40,0 (5,0 - 70,0) | 8,0 (1,0 - 70,0) | --- | U=53,5 | 0,067 | 20,0 (1,0 - 70,0) | 5,0 (1,0 - 60,0) | --- | U=53,5 | 0,067 |
| Change Ki67 | 0,0 (-10,0 - 14,0) | 20,0 (-10,0 - 49,0) | --- | U=57 | 0,097 | 5,0 (-10,0 - 32,0) | 20,0 (0,0 - 65,0) | --- | U=57 | 0,097 |
| Luminal B HER2+ | Pre-NAC Ki67 | 30,0 (5,0 - 40,0) | 35,0 (5,0 - 80,0) | 40,0 (20,0 - 80,0) | =4,69 | 0,096 | 30,0 (5,0 - 80,0) | 37,5 (5,0 - 70,0) | 40,0 (20,0 - 80,0) | =2,536 | 0,281 |
| Post-NAC Ki67 | 20,0 (1,0 - 50,0) | 4,0 (1,0 - 60,0) | --- | U=55,5 | **0,041** | 20,0 (1,0 - 60,0) | 4,0 (1,0 - 50,0) | --- | U=55,5 | **0,041** |
| Change Ki67 | 0,0 (-20,0 - 20,0) | 26,0 (-5,0 - 59,0) | --- | U=43 | **0,011** | 0,0 (-20,0 - 20,0) | 26,0 (0,0 - 59,0) | --- | U=43 | **0,011** |
| HER2+ | Pre-NAC Ki67 | 50,0 (20,0 - 80,0) | 30,0 (10,0 - 80,0) | 60,0 (25,0 - 90,0) | =3,019 | 0,221 | 40,0 (20,0 - 70,0) | 35,0 (10,0 - 80,0) | 60,0 (25,0 - 90,0) | =1,949 | 0,377 |
| Post-NAC Ki67 | 40,0 (20,0 - 80,0) | 8,0 (1,0 - 70,0) | --- | U=11,5 | 0,078 | 60,0 (20,0 - 80,0) | 17,5 (1,0 - 80,0) | --- | U=11,5 | 0,078 |
| Change Ki67 | -10,0 (-30,0 - 50,0) | 10,0 (-10,0 - 39,0) | --- | U=7 | **0,025** | -10,0 (-30,0 - 0,0) | 10,0 (-30,0 - 50,0) | --- | U=7 | **0,025** |
| Triple- | Pre-NAC Ki67 | 80,0 (30,0 - 90,0) | 30,0 (20,0 - 80,0) | 80,0 (40,0 - 95,0) | =3,41 | 0,182 | 30,0 (20,0 - 90,0) | 75,0 (50,0 - 90,0) | 80,0 (40,0 - 95,0) | =5,334 | 0,069 |
| Post-NAC Ki67 | 80,0 (30,0 - 90,0) | 30,0 (7,0 - 80,0) | --- | U=6,000 | 0,209 | 30,0 (7,0 - 80,0) | 80,0 (50,0 - 90,0) | --- | U=10 | 0,123 |
| Change Ki67 | 0,0 (-20,0 - 10,0) | 0,0 (-10,0 - 23,0) | --- | U=11,5 | 0,727 | 0,0 (-10,0 - 23,0) | 0,0 (-20,0 - 20,0) | --- | U=15,5 | 0,487 |

: Kruskal Wallis test statistic, U: Mann-Whitney U test, *It couldn’t be included in the comparision due to insufficient number of observations.
