# Supplementary material for: Assessment of the relationships between Ki67 expression and neoadjuvant treatment response and prognosis in breast cancer using two types of response evaluation systems
Source: Research Square preprint supplement (doi:10.21203/rs.3.rs-1543456/v2), 2022-09-21
Supplement: Supplementary file 2 [file ba4ba81ecd9a74a82bf09b64.docx]

Table 4. Comparision of Ki67 expression and survival according to Miller-Payne , RCB response groups.

|  | Miller-Payne | | | Test statistic | p | RCB | | | Test statistic | p |
| --- | --- | --- | --- | --- | --- | --- | --- | --- | --- | --- |
| pNR | pPR | pCR | pNR | pPR | pCR |
| Mean (min. – max.) | Mean (min. - max) | Mean (min. - max.) |  |  | Mean (min. - max.) | Mean (min. - max.) | Mean (min. - max.) |  |  |
| Pre-NAC Ki67 | 30,0 (5,0 - 90,0)b | 30,0 (5,0 - 80,0)b | 60,0 (20,0 - 95,0)a | =24,627 | **<0,001** | 30,0 (5,0 - 90,0)b | 30,0 (5,0 - 90,0)b | 60,0 (20,0 - 95,0)a | =21,226 | **<0,001** |
| Post-NAC Ki67 | 30,0 (1,0 - 90,0) | 6,0 (1,0 - 80,0) | --- | U=1217,5 | **<0,001** | 20,0 (1,0 - 80,0) | 9,0 (1,0 - 90,0) |  | U=1747,5 | **0,018** |
| Change in Ki67 | 0,0 (-50,0 - 50,0) | 18,0 (-55,0 - 59,0) | --- | U=1029,5 | **<0,001** | 0,0 (-30,0 - 39,0) | 10,5 (-55,0 - 65,0) |  | U=1688,0 | **0,008** |
| OS | 28,0 (4,0 - 74,0) | 30,0 (6,0 - 84,0) | 32,0 (7,0 - 60,0) | =2,143 | 0,343 | 28,0 (7,0 - 74,0) | 30,0 (4,0 - 84,0) | 30,0 (7,0 - 60,0) | =1,254 | 0,534 |
| DFS | 24,0 (3,0 - 54,0) | 28,0 (6,0 - 84,0) | 30,0 (7,0 - 60,0) | =4,656 | 0,098 | 27,5 (7,0 - 55,0) | 28,5 (3,0 - 84,0) | 30,0 (7,0 - 60,0) | =2,326 | 0,312 |

: Kruskal Wallis test statistic, U: Mann-Whitney U test statisitc, a-b: There is no diferance between groups the same letters.
