# Supplementary material for: Assessment of the relationships between Ki67 expression and neoadjuvant treatment response and prognosis in breast cancer using two types of response evaluation systems
Source: Research Square preprint supplement (doi:10.21203/rs.3.rs-1543456/v2), 2022-09-21
Supplement: Supplementary file 3 [file e6526662f2911355493d8ccb.docx]

Tablo 6. Comparision of Ki67 values according to Molecular subtypes and survival

|  | Luminal A | Luminal B HER2- | Luminal B HER2+ | HER2+ | Triple- | Statistic | p |
| --- | --- | --- | --- | --- | --- | --- | --- |
| Pre-NAC Ki67 | 20,0 (5,0 - 80,0)a | 40,0 (5,0 - 80,0)b | 30,0 (5,0 - 80,0)b | 40,0 (10,0 - 90,0)b | 80,0 (20,0 - 95,0)b | =52,991 | **<0.001** |
| Post-NAC Ki67 | 10,0 (1,0 - 70,0)b | 10,0 (1,0 - 70,0)b | 10,0 (1,0 - 60,0)b | 25,0 (1,0 - 80,0)ab | 80,0 (7,0 - 90,0)a | =25,535 | **<0.001** |
| Change Ki67 | 5,0 (-55,0 - 50,0)ab | 14,0 (-10,0 - 65,0)ab | 20,0 (-20,0 - 60,0)a | 4,5 (-30,0 - 50,0)ab | 0,0 (-20,0 - 23,0)b | =14.107 | **0.007** |
| OS | 28,0 (4,0 - 84,0) | 28,0 (8,0 - 79,0) | 31,0 (6,0 - 60,0) | 32,0 (6,0 - 63,0) | 28,0 (9,0 - 46,0) | =0,3.24 | **0.518** |
| DFS | 28,0 (3,0 - 84,0) | 25,0 (8,0 - 79,0) | 31,0 (6,0 - 60,0) | 30,0 (6,0 - 53,0) | 29,0 (9,0 - 46,0) | =2,302 | **0.68** |

: Kruskal Wallis test statistic, a-b: There is no differance between groups the same letters.
